# American Neuropsychiatric Association

The American Neuropsychiatric Association (ANPA), established in 1988, is an organization of professionals in neuropsychiatry, behavioral neurology, neuropsychology and the clinical neurosciences. Our mission is to improve the lives of people with disorders at the interface of psychiatry and neurology.

The strength of the organization is our diversity of membership, which is comprised of professionals all areas of neuroscience who share clinical and/or academic interests in neuropsychiatry. The interdisciplinary nature of the membership encourages collaboration among educators, clinicians, researchers, students and trainees in research presentations, symposia, workshops and/or continuing education courses. *The Journal of Neuropsychiatry and Clinical Neurosciences (JNCN)* is the official publication of the organization, and is a benefit of membership.

ANPA holds an annual scientific meeting and provides up to 30 CME/CE credits. Members are encouraged to submit their work for presentation at these annual meetings. Travel awards are available for promising young investigators. Annual meeting abstracts and proceedings are published in *JNCN*.

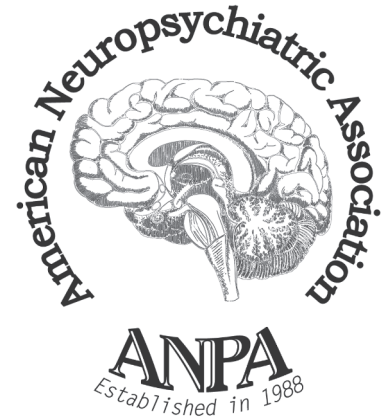

## Contact Information

Website:  
[www.anpaonline.org](http://www.anpaonline.org)

Email:  
[anpa@osu.edu](mailto:anpa@osu.edu)

Phone:  
614-447-2077

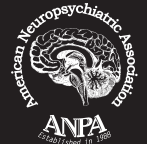

## Join ANPA Now!

**Don't miss ANPA's 23<sup>rd</sup>  
Annual Meeting**

**Sheraton New Orleans Hotel  
New Orleans, Louisiana**

*March 21-24, 2012*

## Benefits of Membership

- Subscription to *The Journal of Neuropsychiatry and Clinical Neurosciences (JNCN)*
- 10% discount for books and journals published by the American Psychiatric Press, Inc
- 20% discount on DSM Select at PsychiatryOnline.com
- Opportunity for presentation at the annual meeting with accepted abstracts published in the *JNCN*
- Significantly reduced registration fees at the annual meeting
- Newsletters, news updates, information on job and training opportunities, research and meeting information on the ANPA web site: [www.anpaonline.org](http://www.anpaonline.org)
- Discounted membership and meeting registration fees for trainees
- Collaboration in clinical, educational and research activities and the opportunity to interact with senior colleagues
- Opportunity to participate on committees and in the future leadership of ANPA
- Opportunity to participate in on-line forums for discussion of research, clinical cases and/or current issues related to neuropsychiatric practice
- Opportunity to join Special Interest Groups for members who have common interests in specific research, clinical cases, practice issues or educational areas

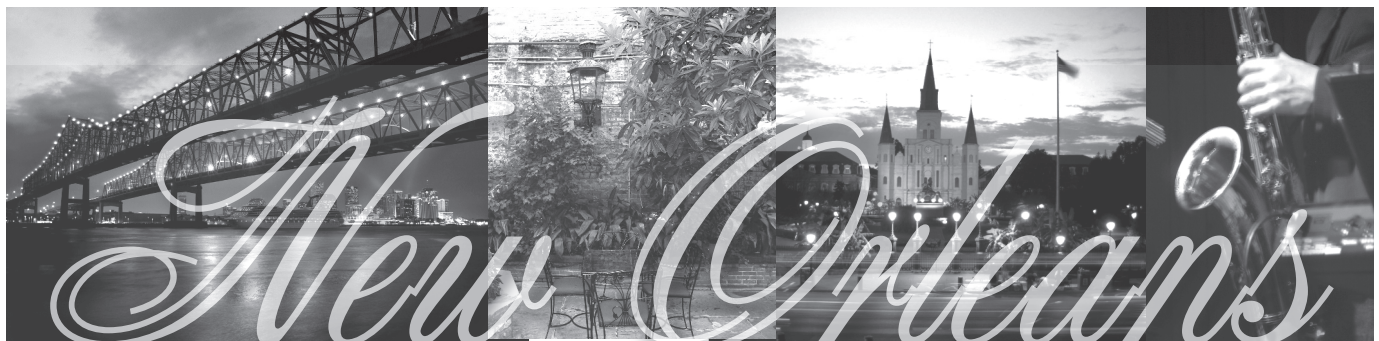

Join online at: [www.anpaonline.org](http://www.anpaonline.org)



23<sup>rd</sup> Annual Meeting

# American Neuropsychiatric Association

www.anpaonline.org

## Meeting Announcement

2012 Annual Meeting Theme: **Mood, Memory & Movement**

Keynote Address by: **Jeffrey L. Cummings, M.D.**

### Wednesday, March 21, 2012

#### PRE-MEETING SYMPOSIA

9:00 am – 12:30 pm

#### WHEN NEUROLOGIC CONDITIONS MIMIC PSYCHIATRIC DISORDERS

Chair: Deborah N. Black, M.D.

*Temporal Lobe Epilepsy and Psychosis*  
Deborah N. Black, M.D.

*Organic Delusional Syndromes*  
Paul F. Malloy, Ph.D.

*Catatonia*  
Georg Northoff, M.D., Ph.D.

2:00 – 5:30 pm

#### AUTOIMMUNE ENCEPHALITIS

Chair: Daniel I. Kaufer, M.D.

*Overview and Case Examples*  
Daniel I. Kaufer, M.D.

*Autoimmune Encephalitis*  
Josep Dalmau, M.D., Ph.D.

### Thursday, March 22, 2012

8:00 – 9:00 am

#### CNPA - PETER BASSOE KEYNOTE ADDRESS

*Neuropsychiatry and Neurotherapeutics*  
Jeffrey L. Cummings, M.D.

9:00 am – 12:30 pm

#### SYMPOSIUM 1: MOOD

*Neurology of Depression and Related Conditions*  
Chair: Helen S. Mayberg, M.D.

*Anatomy of Emotion*  
Kevin N. Ochsner, Ph.D.

*Neurology of Depression*  
Helen S. Mayberg, M.D.

*Treatments of Depression*  
Steven L. Dubovsky, M.D.

2:00 – 4:30 pm

*Clinical Platform Presentations*  
Chair: Sheldon Benjamin, M.D.

4:30 – 5:30 pm

#### POSTER SESSION I

### Friday, March 23, 2012

8:00 – 9:00 am

#### RESEARCH COMMITTEE PRESENTATION

*Aggression in Schizophrenia*  
Jeffrey I. Victoroff, M.D.

9:00 am – 12:30 pm

#### PRESIDENT'S SYMPOSIUM

*Insula, Interoception and Affectivity*  
Chair: Daniel R. Wilson, M.D., Ph.D.

Daniel J. Siegal, M.D.

Martin Brune, M.D., Ph.D.

Marco Iacoboni, M.D., Ph.D.

2:00 – 5:30 pm

#### SYMPOSIUM 2: MEMORY

*Reconsidering Memory Loss in Alzheimer's Disease*  
Chair: Tiffany Chow, M.D.

*Beyond the Episodic/Semantic Memory Distinction in Alzheimer's Disease*  
Asaf Gilboa, Ph.D.

*Recollection Deficits in Amnesic MCI and Their Management*

Nicole D. Anderson, Ph.D.

*Memory Loss in Alzheimer's Disease: A Behavioral Neurologist's Viewpoint*  
Tiffany Chow, M.D.

### Saturday, March 24, 2012

8:30 – 12:00 noon

#### SYMPOSIUM 3: MOVEMENT

*Neuropsychiatry of Parkinson's Disease*  
Chair: Laura Marsh, M.D.

*Motor Aspects of Parkinson's Disease*  
Michael S. Okun, M.D.

*Mood and Parkinson's Disease*  
Laura Marsh, M.D.

*Cognition and Parkinson's Disease*  
Alexander I. Tröster, Ph.D.

1:30 – 4:00 pm

#### RESEARCH PLATFORM PRESENTATIONS

Chair: Jeremy D. Schmahmann, M.D.

4:00 – 5:00 pm

#### POSTER SESSION II

6:00 – 8:30 pm

*AWARDS BANQUET AND PRESIDENTIAL ADDRESS*  
Daniel R. Wilson, M.D., Ph.D.

#### Accreditation Statement

This activity has been planned and implemented in accordance with the Essential Areas and policies of the Accreditation Council for Continuing Medical Education (ACCME®) through the joint sponsorship of The Ohio State University Medical Center, Center for Continuing Medical Education (CCME) and the American Neuropsychiatric Association. The CCME is accredited by the ACCME to provide continuing medical education for physicians.

#### AMA Credit Designation Statement

The Ohio State University Medical Center designates this educational activity for a maximum of 28 AMA PRA Category 1 Credit(s)™. Physicians should only claim credit commensurate with the extent of their participation in the activity.

Meeting information can be found on the ANPA web site:

[www.anpaonline.org](http://www.anpaonline.org)

Sheraton New Orleans Hotel • 500 Canal Street • New Orleans, LA 70130

## March 21-24, 2012

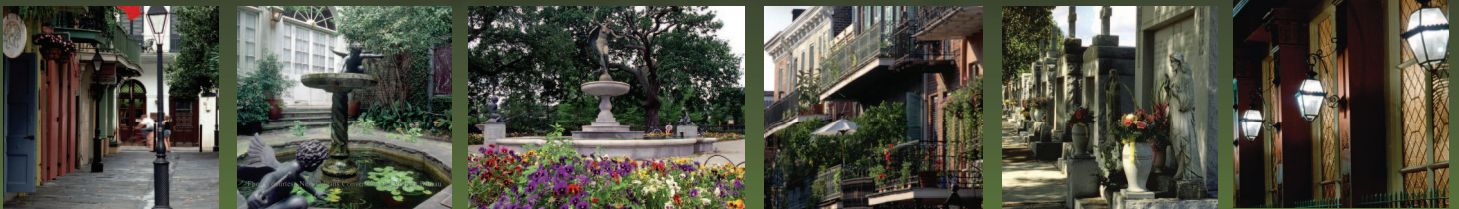

For more information contact the American Neuropsychiatric Association office:  
700 Ackerman Road, Suite 625 • Columbus, Ohio USA 43202 • Phone: 614-447-2077 • E-mail: [anpa@osu.edu](mailto:anpa@osu.edu) • Website: [www.anpaonline.org](http://www.anpaonline.org)
