# THE JOURNAL OF NEUROPSYCHIATRY and Clinical Neurosciences

The Official Journal of the American Neuropsychiatric Association

## In this issue:

- What Does Epilepsy Tell Us About the Neural Correlates of Consciousness?
- Hashimoto's Encephalopathy: Systematic Review of the Literature and an Additional Case
- Clock-Drawing Performance Predicts Inpatient Rehabilitation Outcomes After Traumatic Brain Injury
- PTSD, Attention Bias, and Heart Rate After Severe Brain Injury
- Neurocognitive Functioning in Youth With Pediatric Autoimmune Neuropsychiatric Disorders Associated With Streptococcus

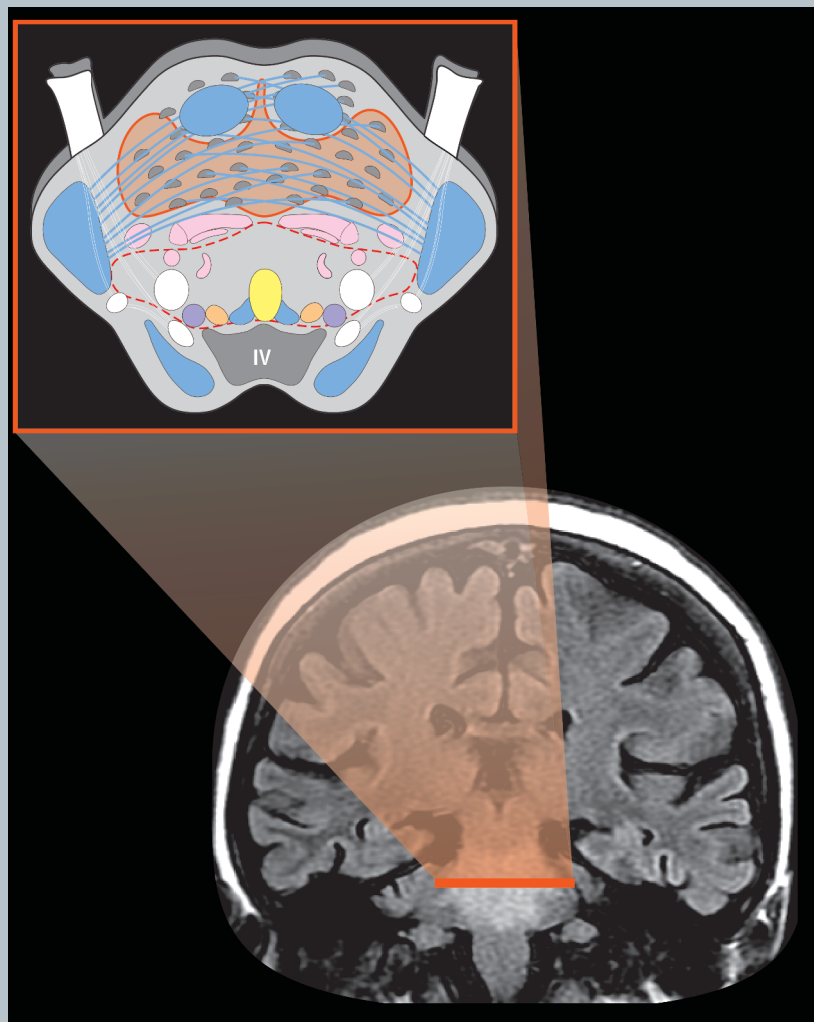

Source: http://neuro.psychiatryonline.org/doi/suppl/10.1176/jnp.2011.23.issue-4/suppl_file/cover.pdf
